# Supplementary material for: Organic substrate diffusibility governs microbial community composition, nutrient removal performance and kinetics of granulation of aerobic granular sludge
Source: PubMed Central journal article supplement (PMC6614711; doi:10.1016/j.wroa.2019.100033), 2019-05-20
Supplement: mmc1.pdf [file mmc1.pdf]

1 Organic substrate diffusibility governs microbial community composition, nutrient removal  
2 performance and kinetics of granulation of aerobic granular sludge

3 **SUPPLEMENTARY INFORMATION**

4 M. Layer<sup>\*\*</sup>, A. Adler<sup>\*\*\*</sup>, E. Reynaert<sup>\*\*\*\*</sup>, A. Hernandez<sup>\*\*\*\*</sup>, M. Pagni<sup>\*\*\*\*</sup>, E. Morgenroth<sup>\*\*</sup>,  
5 C. Holliger<sup>\*\*\*</sup>, N. Derlon<sup>\*</sup>

6 <sup>\*</sup> Eawag, Swiss Federal Institute of Aquatic Science and Technology, Überlandstrasse 133, 8600 Dübendorf, Switzerland

7 <sup>\*\*</sup> ETH Zürich, Institute of Environmental Engineering, 8093 Zürich, Switzerland

8 <sup>\*\*\*</sup> Ecole Polytechnique Fédérale de Lausanne (EPFL), ENAC IIE Laboratory for Environmental Biotechnology, 1015  
9 Lausanne, Switzerland

10 <sup>\*\*\*\*</sup> SIB Swiss Institute of Bioinformatics, 1015 Lausanne, Switzerland

11 Emails of the authors: Manuel.Layer@eawag.ch, Aline.Adler@epfl.ch

12 Corresponding author: Nicolas Derlon: Nicolas.Derlon@eawag.ch

13 **Table S1:** Composition of trace element solution, after preparation pH is adapted to 6 using KOH  
 14 (30% v/v).

| Component                    | Formula                                                                                           | Concentration [g L <sup>-1</sup> ] |
|------------------------------|---------------------------------------------------------------------------------------------------|------------------------------------|
| EDTA disodium salt dihydrate | C <sub>10</sub> H <sub>14</sub> N <sub>2</sub> Na <sub>2</sub> O <sub>8</sub> * 2H <sub>2</sub> O | 16.215                             |
| Zinc II Sulfate              | ZnSO <sub>4</sub> * 7H <sub>2</sub> O                                                             | 0.44                               |
| Manganese II Chloride        | MnCl <sub>2</sub> * 6H <sub>2</sub> O                                                             | 1.012                              |
| Ammonium Iron II             | (NH <sub>4</sub> ) <sub>2</sub> Fe(SO <sub>4</sub> ) <sub>2</sub> * 6H <sub>2</sub> O             | 7.049                              |
| Ammonium Molybdate           | (NH <sub>4</sub> ) <sub>6</sub> Mo <sub>7</sub> O <sub>24</sub> * 4H <sub>2</sub> O               | 0.328                              |
| Copper II Sulfate            | CuSO <sub>4</sub> * 5H <sub>2</sub> O                                                             | 0.314                              |
| Cobalt II Chloride           | CoCl <sub>2</sub> * 6H <sub>2</sub> O                                                             | 0.322                              |

15

16 **Table S2:** Recipe of influent WW of 100%-VFA synthetic WW and Complex synthetic WW  
 17 receiving reactors R1 and R2. The recipes only provide C and N species to the wastewater preparation.  
 18 The recipes were prepared in 20-fold concentration, to provide total COD and TN concentrations of  
 19 600 mg COD L<sup>-1</sup> and 52 mg TN L<sup>-1</sup>, respectively.

| Component                            | 100%-VFA synthetic WW              | Complex synthetic WW               |
|--------------------------------------|------------------------------------|------------------------------------|
|                                      | Concentration [g L <sup>-1</sup> ] | Concentration [g L <sup>-1</sup> ] |
| NaAcetate*3H <sub>2</sub> O          | 12.8                               | 4.3                                |
| NaPropionate                         | 4.8                                | 1.6                                |
| (NH <sub>4</sub> )Cl                 | 3.2                                | 1.1                                |
| CaCl <sub>2</sub> *1H <sub>2</sub> O | 0.35                               | 0.35                               |
| MgSO <sub>4</sub>                    | 0.33                               | 0.33                               |
| KCl                                  | 0.66                               | 0.66                               |
| Glucose/Dextrose                     | -                                  | 1.9                                |
| Starch                               | -                                  | 1.4                                |
| Peptone                              | -                                  | 1.6                                |
| Alanine                              | -                                  | 0.27                               |
| Arginine                             | -                                  | 0.26                               |
| Aspartic acid                        | -                                  | 0.40                               |
| Glutamic acid                        | -                                  | 0.29                               |
| Glycine                              | -                                  | 0.45                               |
| Leucine                              | -                                  | 0.16                               |
| Proline                              | -                                  | 0.19                               |

20

21 **Protocol S3:** Amplification of 16S rRNA gene by polymerase chain reaction.

22 The bacterial 16S rRNA gene hypervariable regions V1-V2 were amplified by PCR using the  
23 universal primers 27F and 338R (bold), respectively, (bold) with overhang adapters attached: forward  
24 (5' TCGTCGGCAGCGTCAGATGTGTATAAGAGACAG-**AGMGTTYGATYMTGGCTCAG**3')  
25 and reverse (5'GTCTCGTGGGCTCGGAGATGTGTATAAGAGACA-  
26 **GGCTGCCTCCCGTAGGAGT**3'), and the High-Fidelity Q5 polymerase (High-fidelity 2x Master  
27 Mix, Biolabs Inc., USA). For each sample, 25 ng of DNA were mixed with forward primers 27F and  
28 reverse primers 338R for a final concentration of 0.5 uM each and completed with Q5 High-Fidelity  
29 2x master mix water, for a final volume of 50ul. The PCR runs were performed in a T3000  
30 Thermocycler (Biometra GmbH, Germany) with the following steps: initiation (2 minutes, 95°C),  
31 followed by 30 cycles of denaturation (45 seconds, 95°C), annealing (45 seconds, 50°C) and  
32 elongation (60 seconds, 72°C) and a final extension step (5 minutes, 72°C).

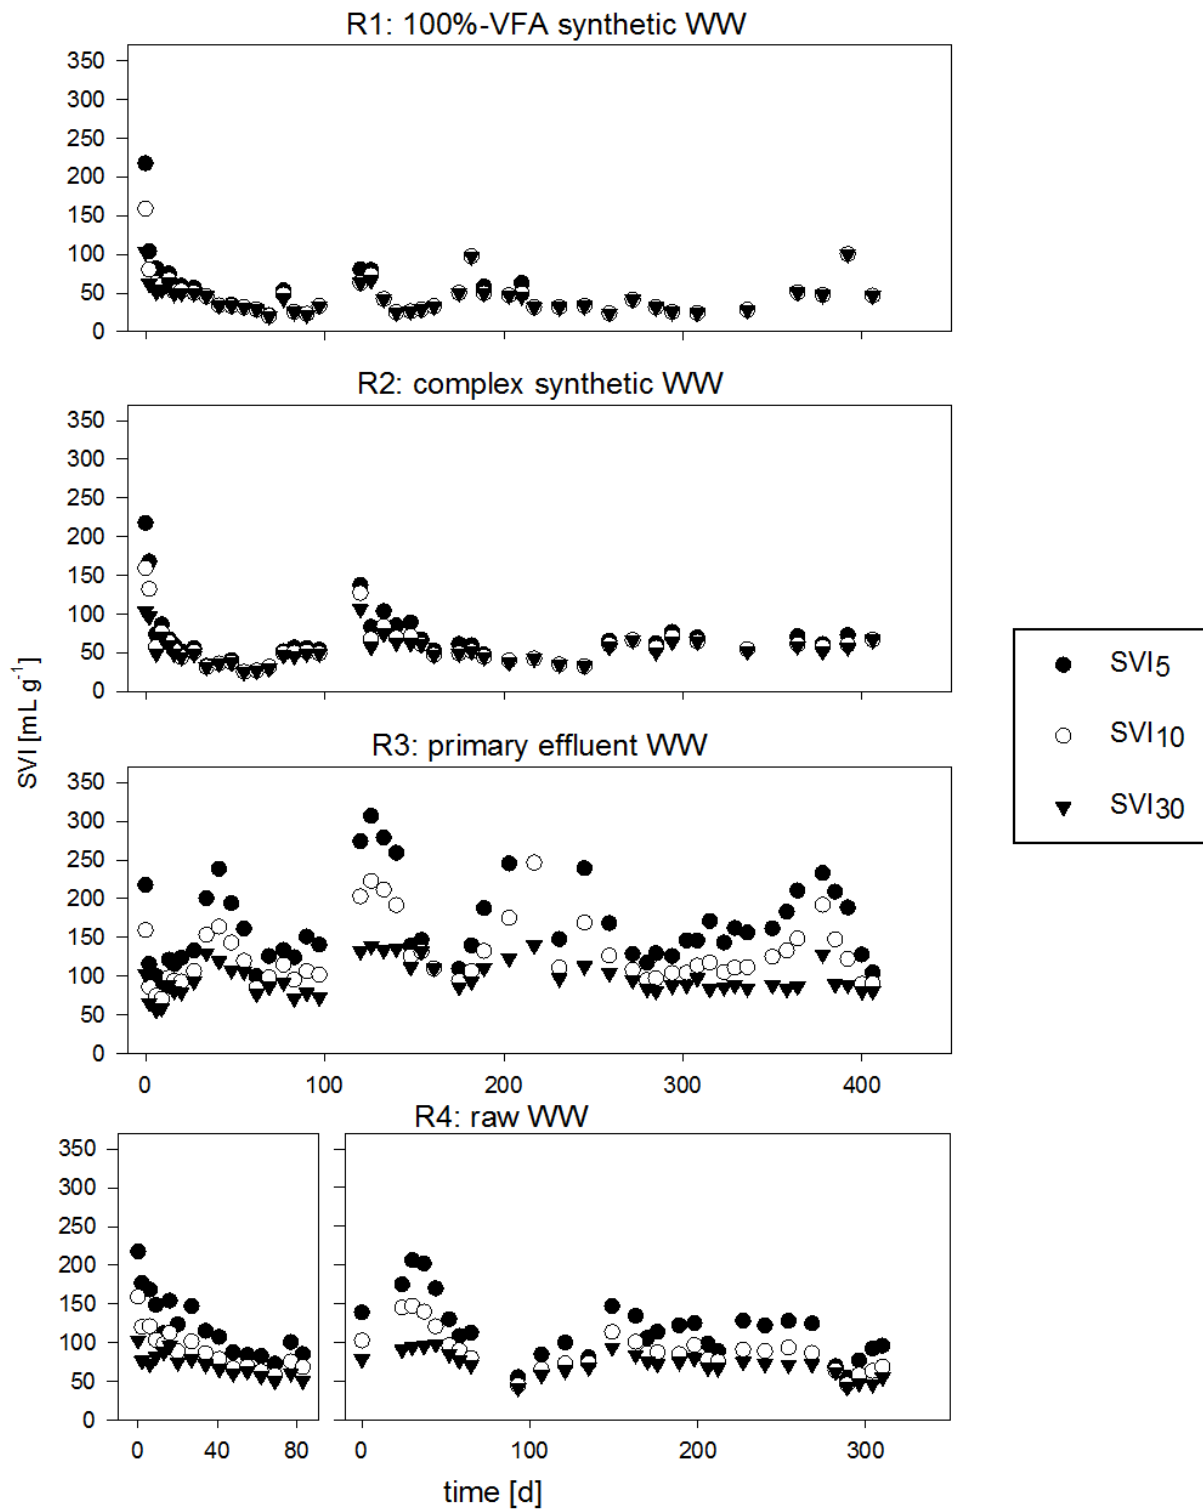

33

34 **Figure S4:** Evolution of SVI<sub>5</sub>, SVI<sub>10</sub> and SVI<sub>30</sub> of R1, R2, R3, R4 run#1 and run#2



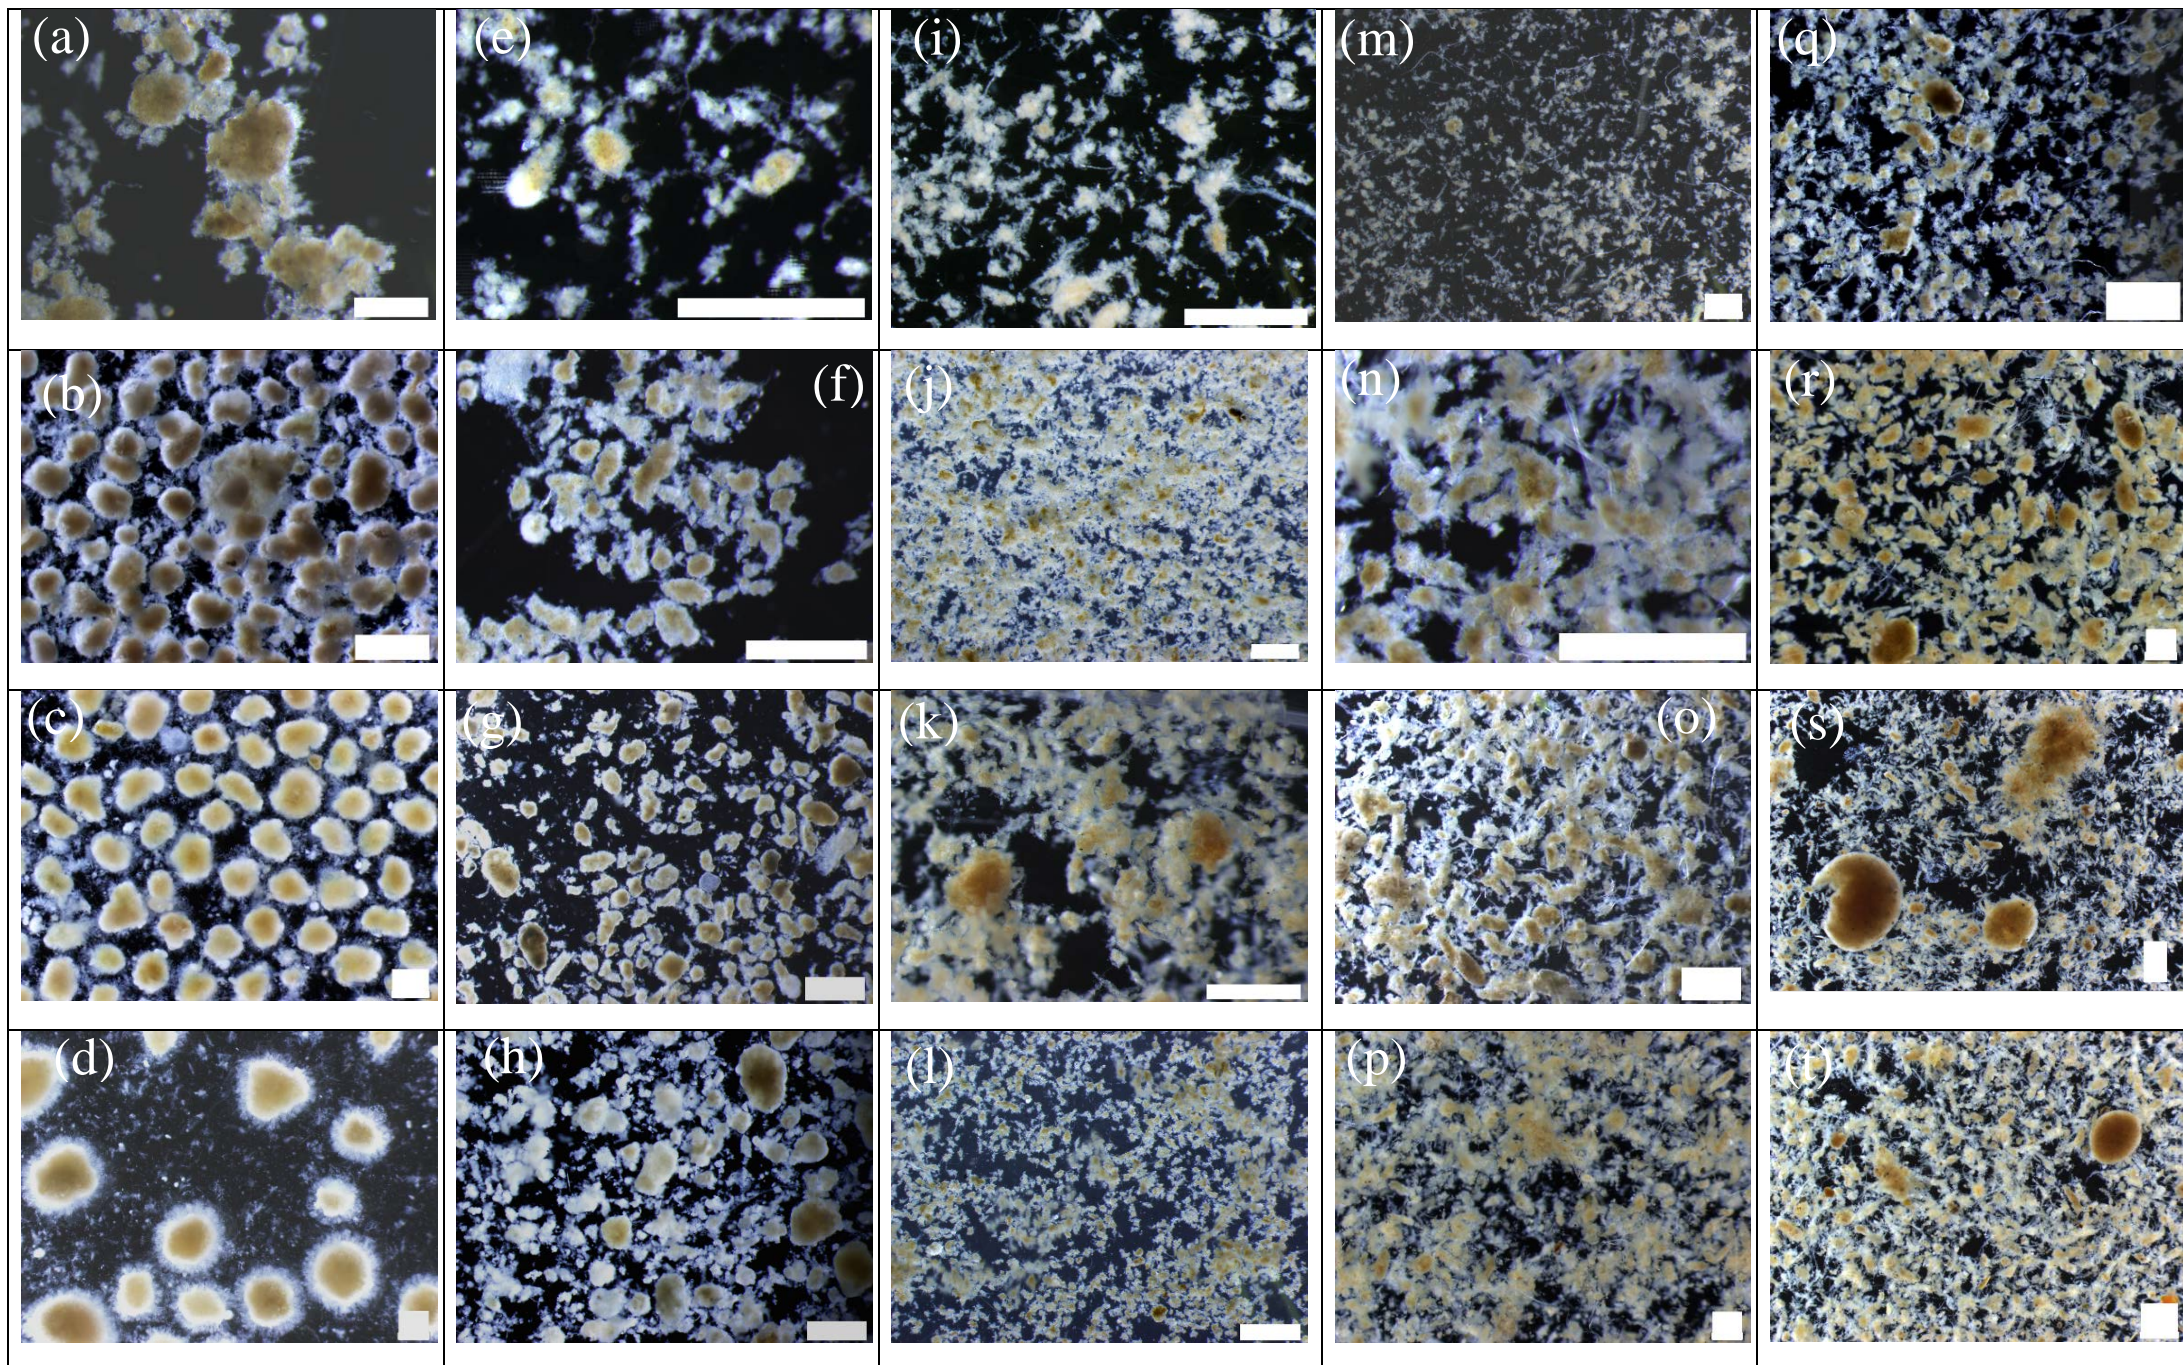



36 **Figure S5:** Evolution of sludge morphology in R1 fed by 100%-VFA synthetic WW (**a, b, c, d**) after  
37 12, 57, 93, and 190 days of operation, in R2 fed with complex synthetic WW (**e, f, g, h**) after 12, 34,  
38 57, and 100 days, in R3 fed with primary effluent WW (**i, j, k, l**) after 7, 147, 279, and 400 days, and  
39 in R4 fed with raw WW (**m, n, o, p** for run#1, **q, r, s, t** for run#2) after 7, 22, 57, and 84 days for  
40 run#1, and after 4, 100, 163, and 212 days for run#2. Size bars = 1.0 mm. Morphology of AGS fed by  
41 100%-VFA influent WW (R1) significantly differed from the morphology of the AGS fed by complex  
42 synthetic WW (R2) and municipal WW (R3, R4). AGS of R1 was composed of large, round-shaped,  
43 dense and overall homogenous shaped aggregates that dominated overall sludge morphology  
44 (Figure S5a-d). Almost no flocs were observed. Operational issues of carbon leakage (Supplementary  
45 information Figure S15) from anaerobic to aerobic phase were the cause of filamentous outgrowth at  
46 the granules surface, visible on Figure S5d, after 190 days of operation. Visual observations indicated  
47 that AGS fed with complex influent WW (R2, R3, R4) were composed of both flocs and small and  
48 dense aggregates. Formation of “finger-type” granules was not observed in R2, despite the feed of  
49 particulate substances (starch). The highest complexity WW fed systems R3 and R4 also resulted in  
50 the most complex sludge morphology. In these reactors, aggregates with dense cores formed, but with  
51 very heterogeneous sizes and shapes. The formation of “finger-type” granules was observed  
52 (Figure S5p and t) but never over prolonged time. Large amounts of fibers or debris from the influent  
53 also accumulated in those systems (Figure S5n and q). First appearance of granules took much longer  
54 in complex WW fed reactors R2, R3 and R4 compared to R1. In R1 first granules were observed  
55 already after 12 days of operation (Figure S5a). The formation of granules in the complex WW fed  
56 reactors R2, R3 and R4 was much slower in comparison. In R2 it took 30 days until first round-shaped  
57 and dense granules were observed (Figure S5f). Granules only appeared after 100 days of operation in  
58 R4 run#2 and 279 days in R3. No large granules were observed in R4 during run#1, which was shorter  
59 than 100 days.

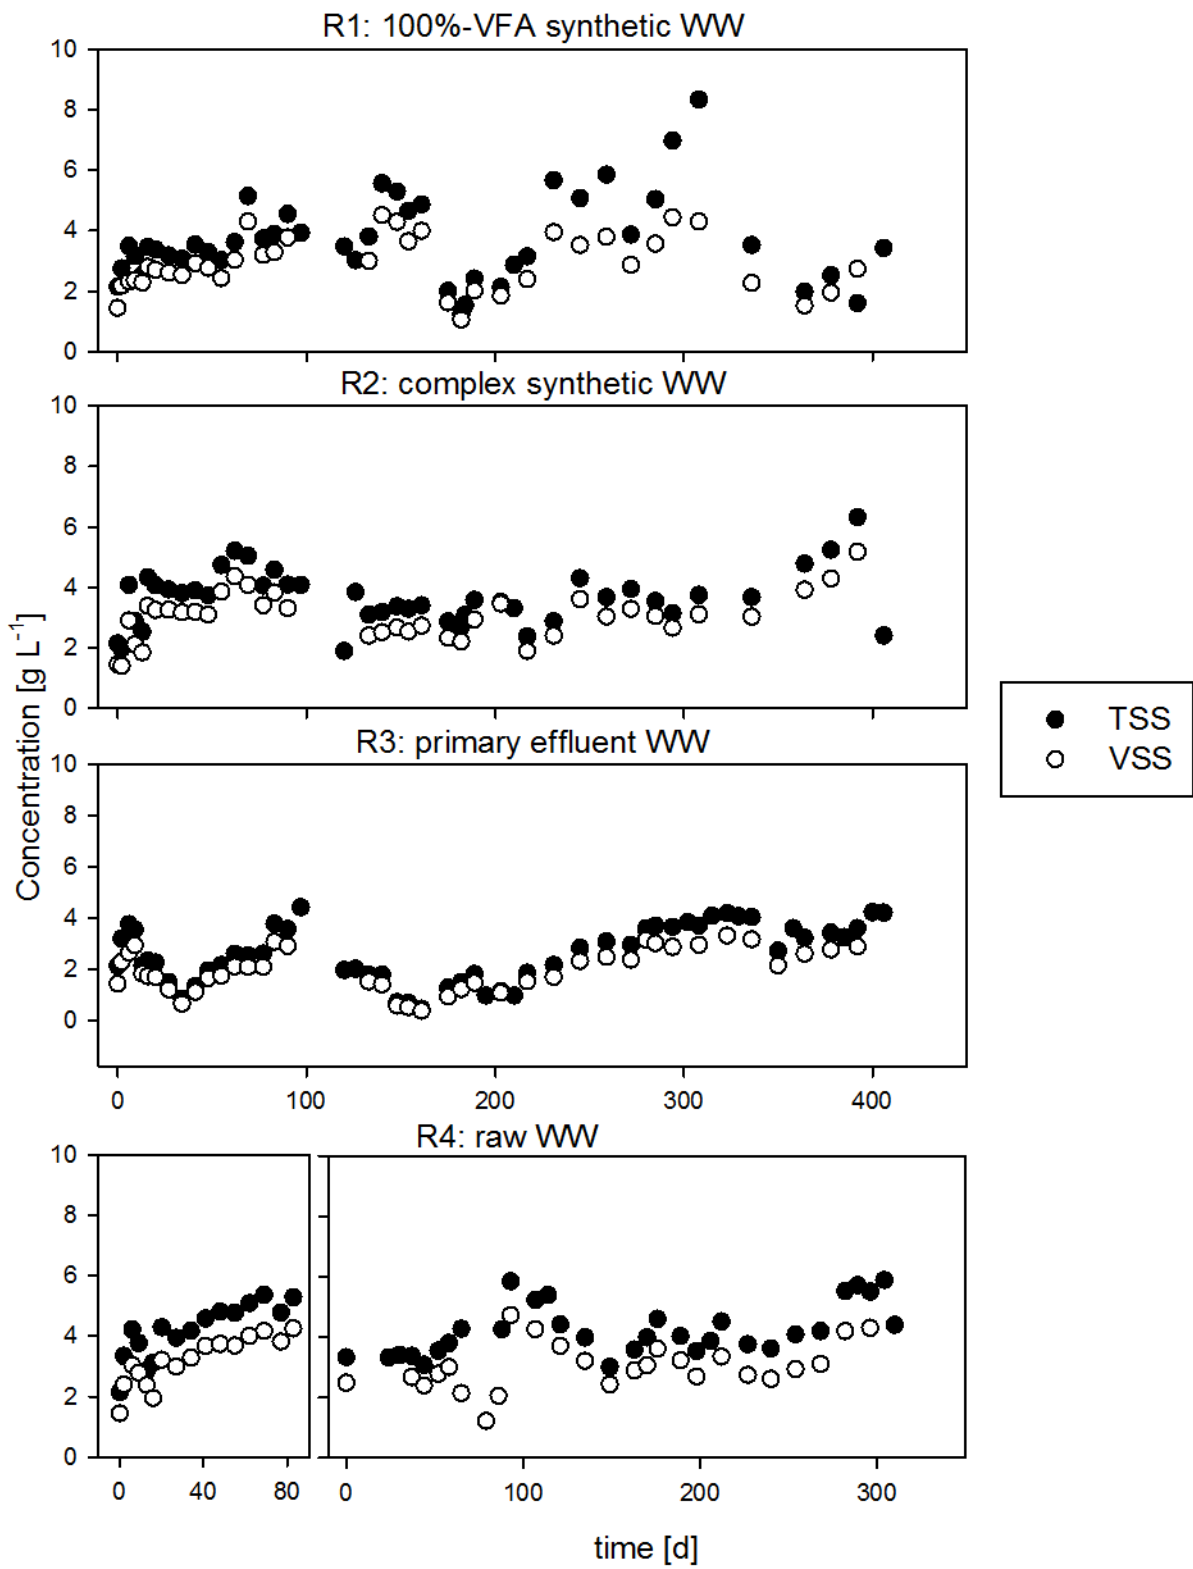

60

61 **Figure S6:** Evolution of TSS and VSS of R1, R2, R3, R4 run#1 and run#2

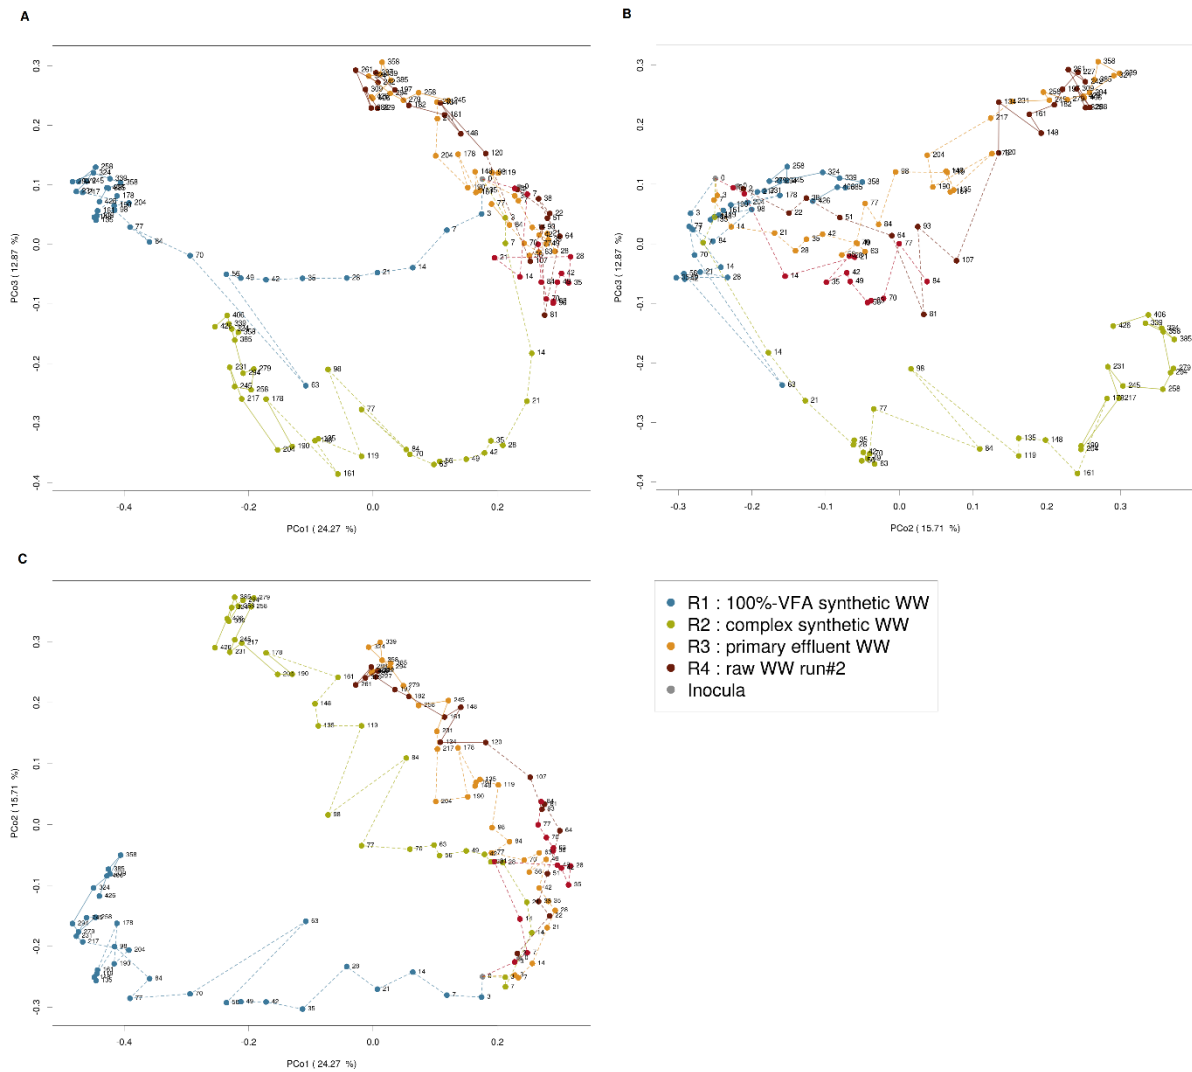

62

63 **Figure S7:** Principal component analysis of microbial communities structure evolution during the

64 experiment, (A) on the 1<sup>st</sup> and 3<sup>rd</sup> axis (B) on the 2<sup>nd</sup> and 3<sup>rd</sup> axis and on the 1<sup>st</sup> and 2<sup>nd</sup> axis (C)



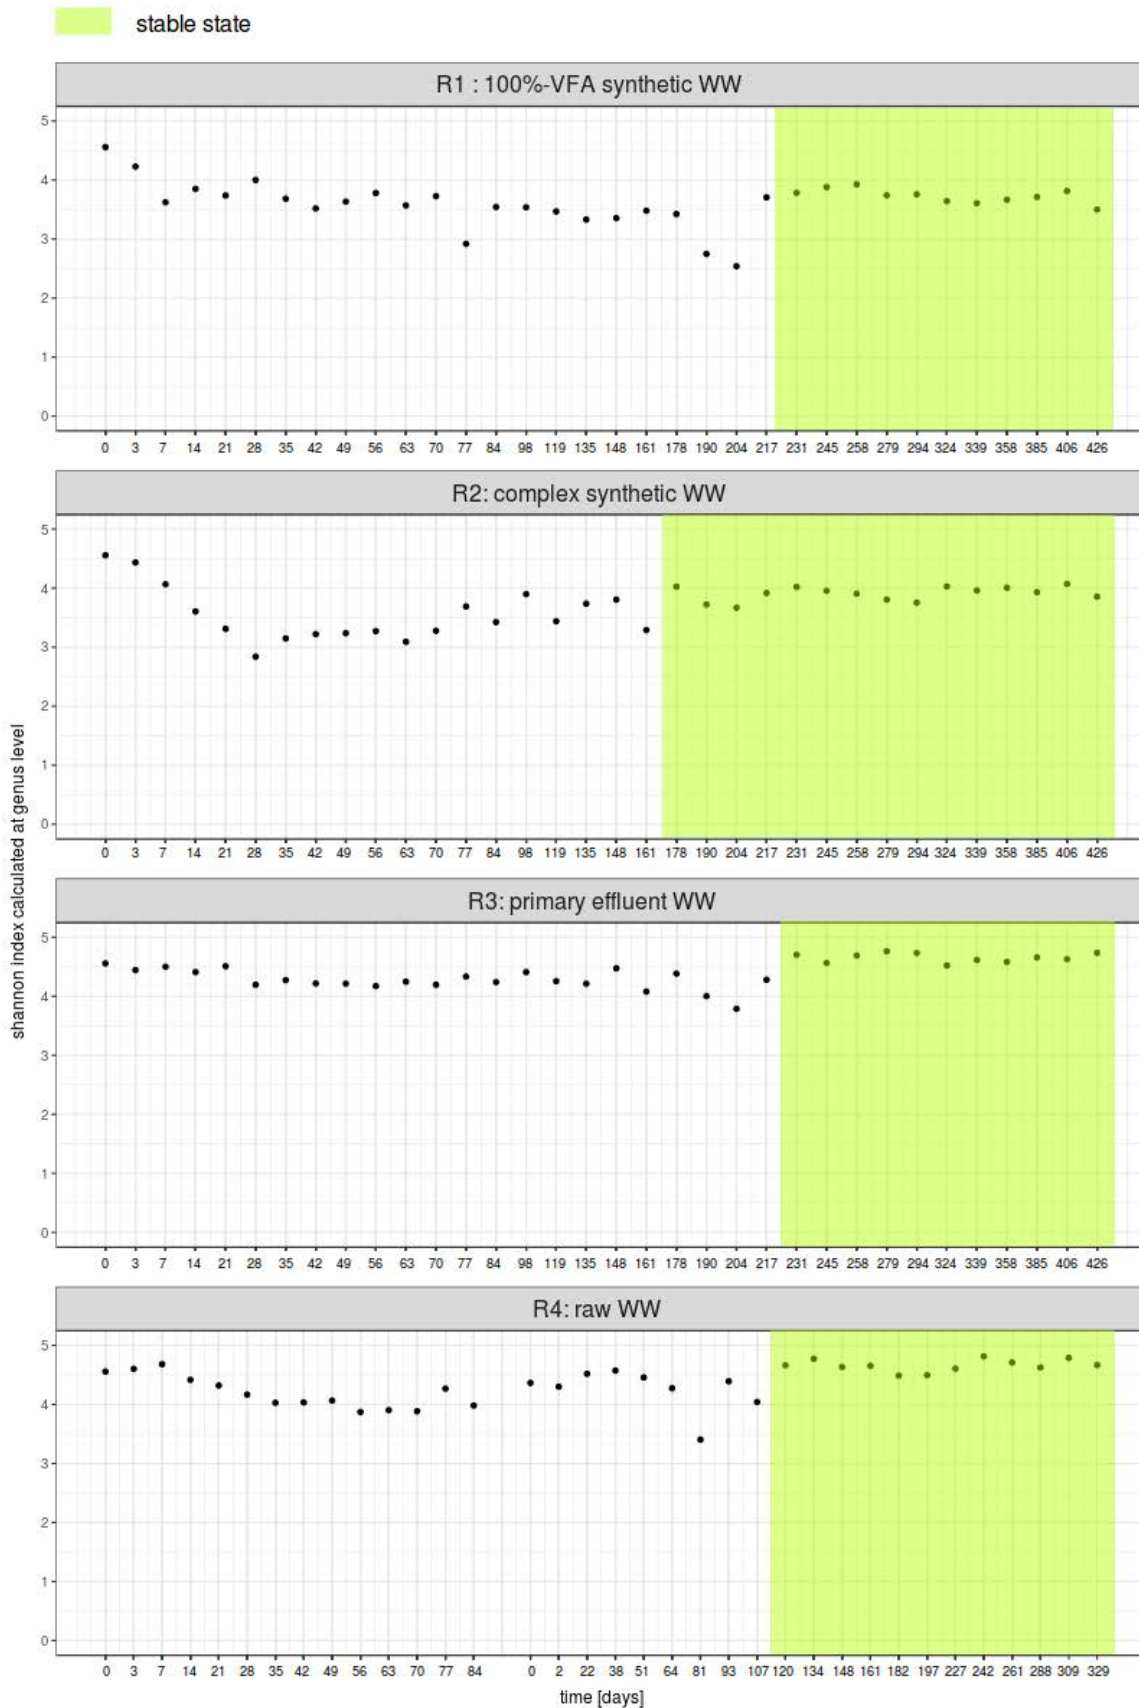

65  
 66 **Figure S8:** Evolution of the Shannon diversity index during the experiment in the four reactors. The  
 67 values corresponding to the reactor treating raw WW (R4) are shown for both run#1 and run#2. The  
 68 periods corresponding to the stable state of the bacterial communities are indicated in green.

69 **Table S9:** p-values of the t-test based on the null hypothesis that the mean relative abundance is the  
70 same in two different reactors at stable state for a selection of taxa. The complete table is in the file  
71 “S9\_discriminant\_and\_p\_value\_t\_tests.xlsx”.

72 **Table S10:** p-values of the t-test comparing the relative abundance of the main genera in the floccular  
73 and the granular fraction of the sludge.

| Genus                     | R1      | R2      | R3      | R4      |
|---------------------------|---------|---------|---------|---------|
| 480_2 (f)                 | 1.8E-01 | 9.7E-02 | 4.8E-01 | 5.7E-01 |
| <i>Ca. Accumulibacter</i> | 9.8E-01 | 4.8E-04 | 8.8E-01 | 8.6E-01 |
| <i>Azoarcus</i>           | 5.6E-01 | 8.5E-01 | 1.7E-01 | 4.9E-02 |
| <i>Ca. Competibacter</i>  | 4.6E-02 | 9.0E-03 | 4.5E-01 | 2.8E-02 |
| <i>CPB_CSI</i>            | 2.0E-01 | 4.0E-01 | 6.5E-01 | 2.1E-01 |
| <i>CYCU-0281</i>          | 6.5E-01 | 4.4E-01 | 6.8E-01 | 9.7E-01 |
| <i>Flavobacterium</i>     | 9.1E-01 | 1.2E-01 | 5.7E-02 | 4.4E-01 |
| <i>Kouleothrix</i>        | 4.8E-01 | 6.3E-01 | 7.2E-02 | 4.3E-02 |
| <i>Micropruina</i>        | 6.3E-02 | 3.0E-04 | 3.9E-03 | 6.1E-03 |
| <i>Nitrospira</i>         | 2.2E-06 | 5.6E-02 | 5.3E-01 | 5.0E-08 |
| <i>P58</i>                | 8.9E-01 | 9.4E-01 | 1.9E-01 | 8.3E-01 |
| <i>Rhodobacter</i>        | 3.5E-04 | 3.0E-01 | 7.2E-01 | 3.4E-01 |
| <i>Runella</i>            | 2.8E-02 | 3.3E-01 | 9.8E-01 | 4.9E-01 |
| Saccharibacteria (p)      | 5.7E-02 | 2.8E-01 | 6.1E-01 | 2.6E-01 |
| <i>Tetrasphaera</i>       | 7.1E-01 | 6.7E-01 | 6.3E-01 | 5.0E-01 |
| <i>Trichococcus</i>       | 2.9E-03 | 5.9E-01 | 1.8E-01 | 3.9E-03 |
| Xanthomonadaceae (f)      | 6.8E-01 | 2.2E-03 | 1.4E-01 | 7.8E-02 |
| <i>Zoogloea</i>           | 1.1E-02 | 2.0E-04 | 3.8E-01 | 1.6E-01 |
| <i>Terrimonas</i>         | 2.7E-04 | 5.8E-01 | 4.8E-01 | 3.1E-01 |
| <i>Thauera</i>            | 3.1E-01 | 9.8E-01 | 6.5E-01 | 8.8E-06 |

74

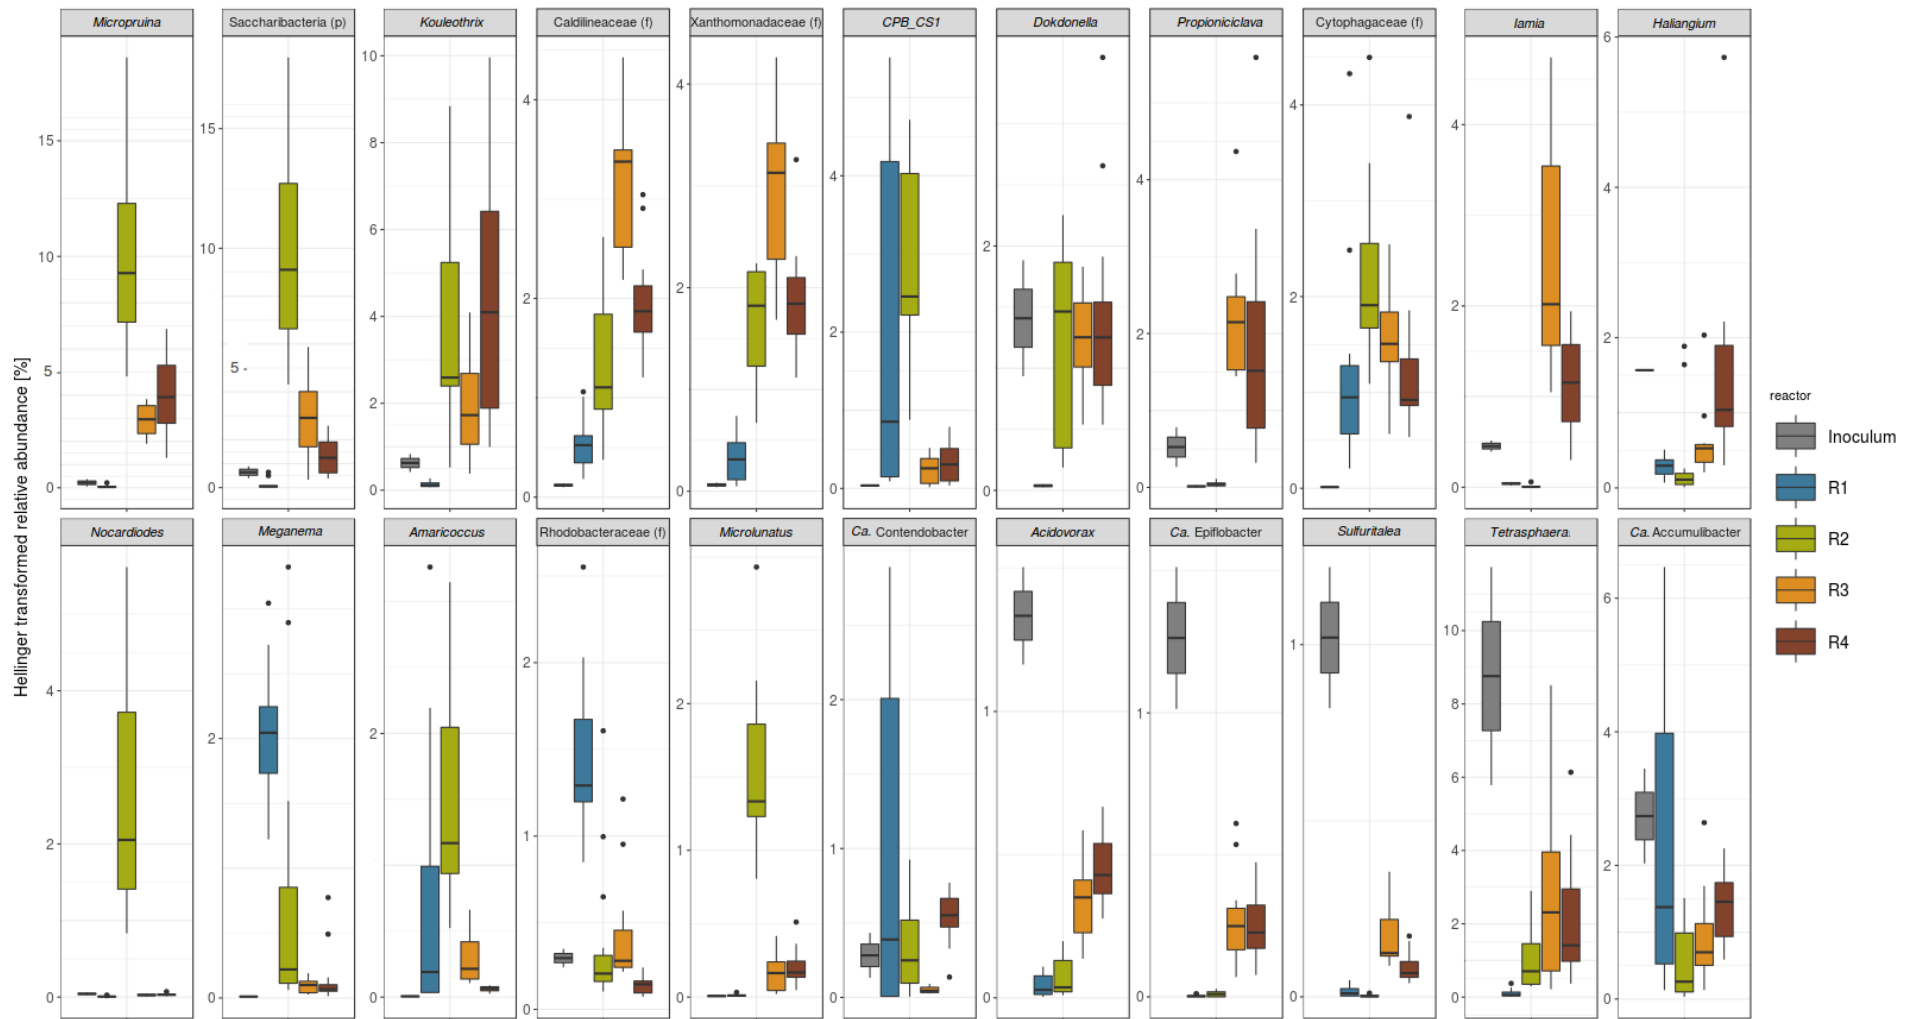

75  
76  
77

**Figure S11:** Boxplot of the Hellinger transformed abundance of the more discriminant genera (at least one p-value below  $10 \text{ E-}7$  in the t-test), *Tetrasphaera* and *Ca. Accumulibacter*, in the four reactors and the inocula.

78 **Table S12:** Bray-Curtis distance matrices of the bacterial community compositions, the settling  
79 properties and size distribution of the sludge and its nutrient-removal performances at stable state. The  
80 three complete tables are in the file “S12\_bray\_distance\_matrices\_stable\_state.xlsx”.

81 **Table S13:** Mantel test comparing the Bray-Curtis distance matrices of the microbial communities, the  
82 settling and size characteristics of the sludge and its nutrient-removal performance, at bacterial stable  
83 state.

| Dataset                                  | Mantel statistic | Significance |
|------------------------------------------|------------------|--------------|
| Microbial communities vs settling        | 0.6454           | 0.001        |
| Microbial communities vs nutrientremoval | 0.0470           | 0.195        |
| Settling vs nutrient-removal             | 0.2138           | 0.009        |

84 **Table S14:** Average relative abundance of the bacterial taxa (at genus level) in the inoculum and the  
85 four reactors during stable state. The complete table is in the file  
86 “S14\_genera\_mean\_abundance\_at\_stable\_state.xlsx”.

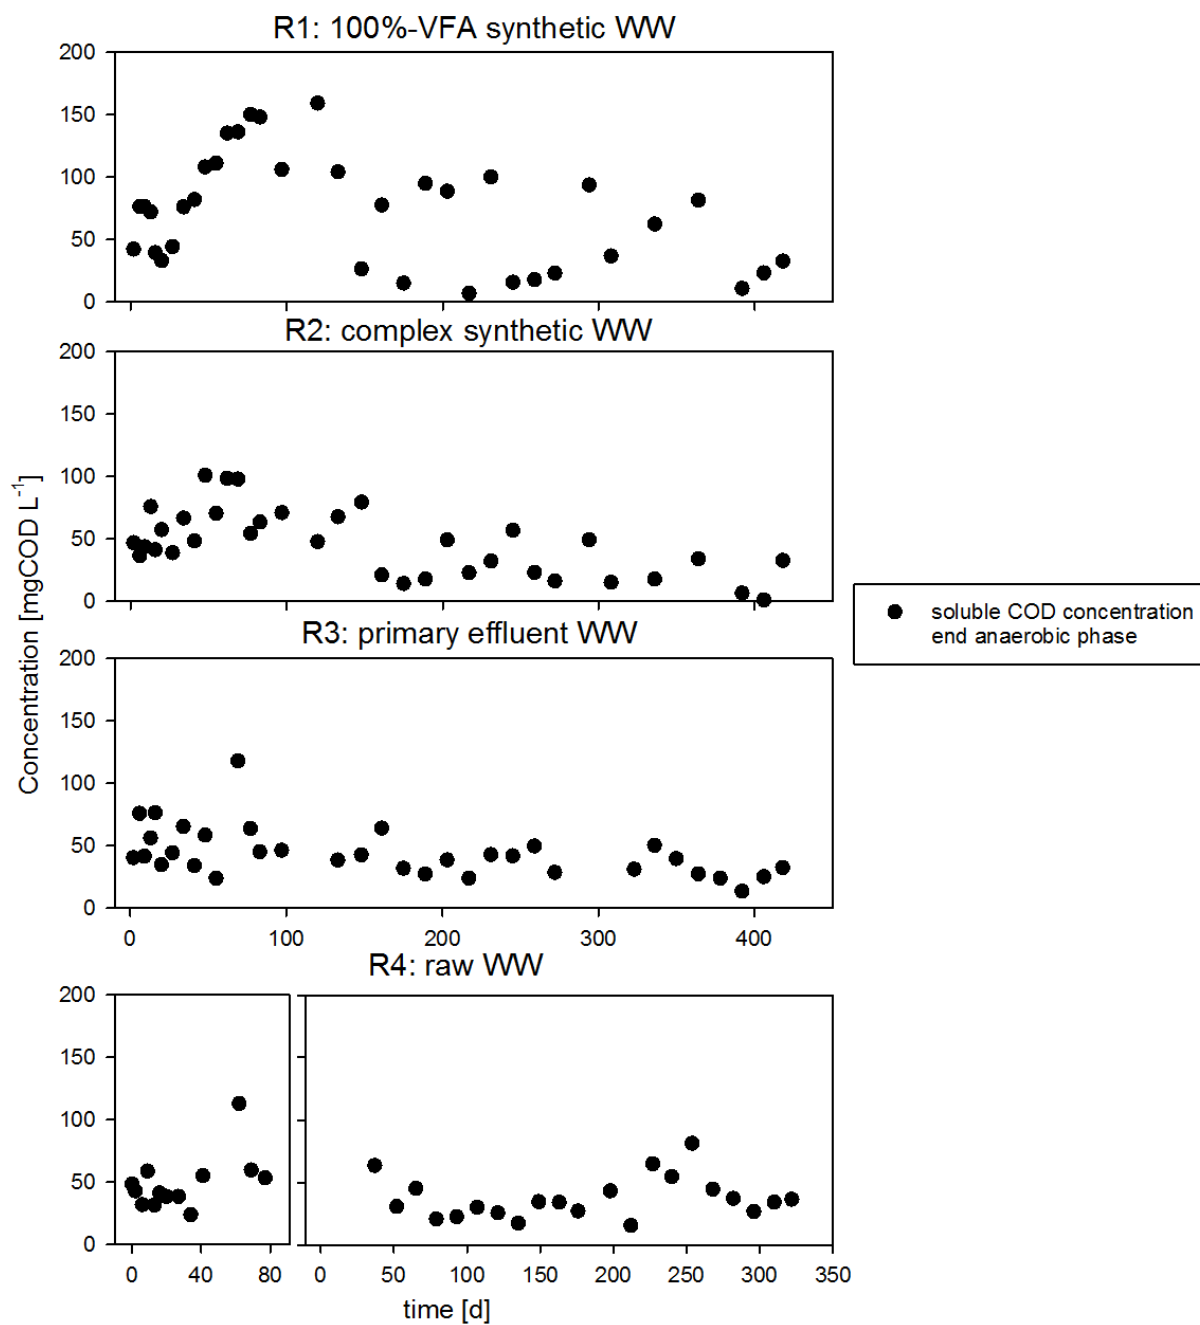

87  
88 **Figure S15:** Soluble COD concentrations after the anaerobic phase of R1, R2, R3, R4 run#1 (row 4,  
89 left) and R4 run#1 (row 4, right).



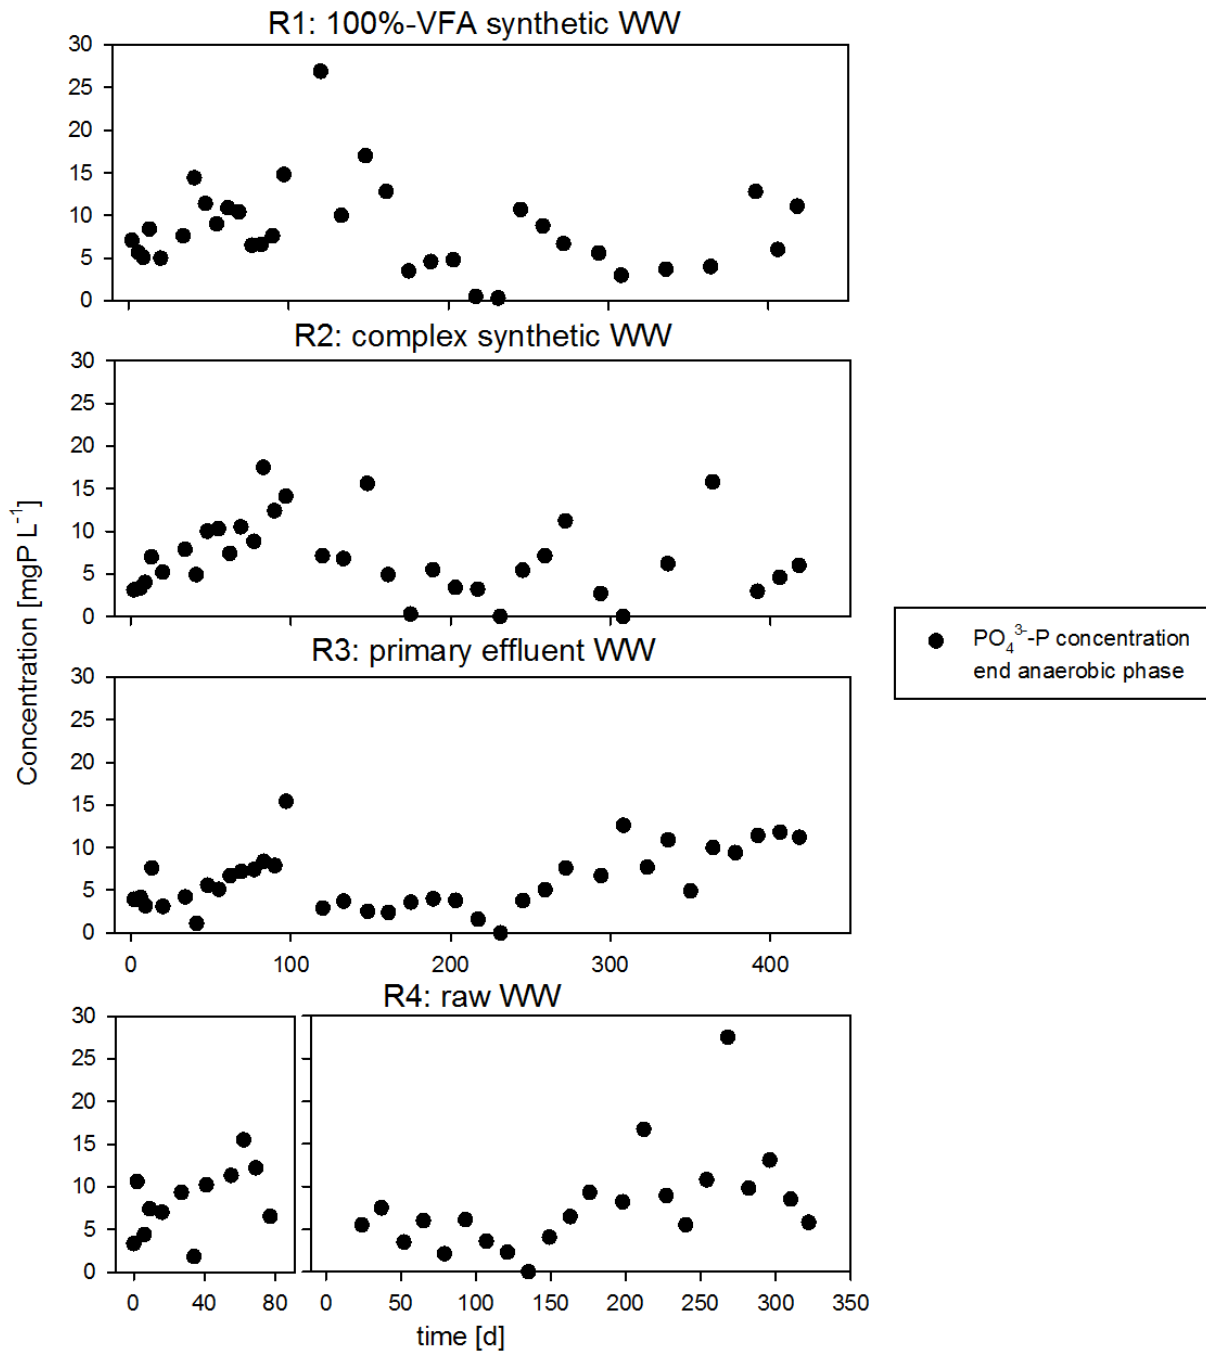

90  
 91 **Figure S16:** PO<sub>4</sub><sup>3-</sup>-P concentrations after the anaerobic phase of R1, R2, R3, R4 run#1 (row 4, left)  
 92 and R4 run#1 (row 4, right).

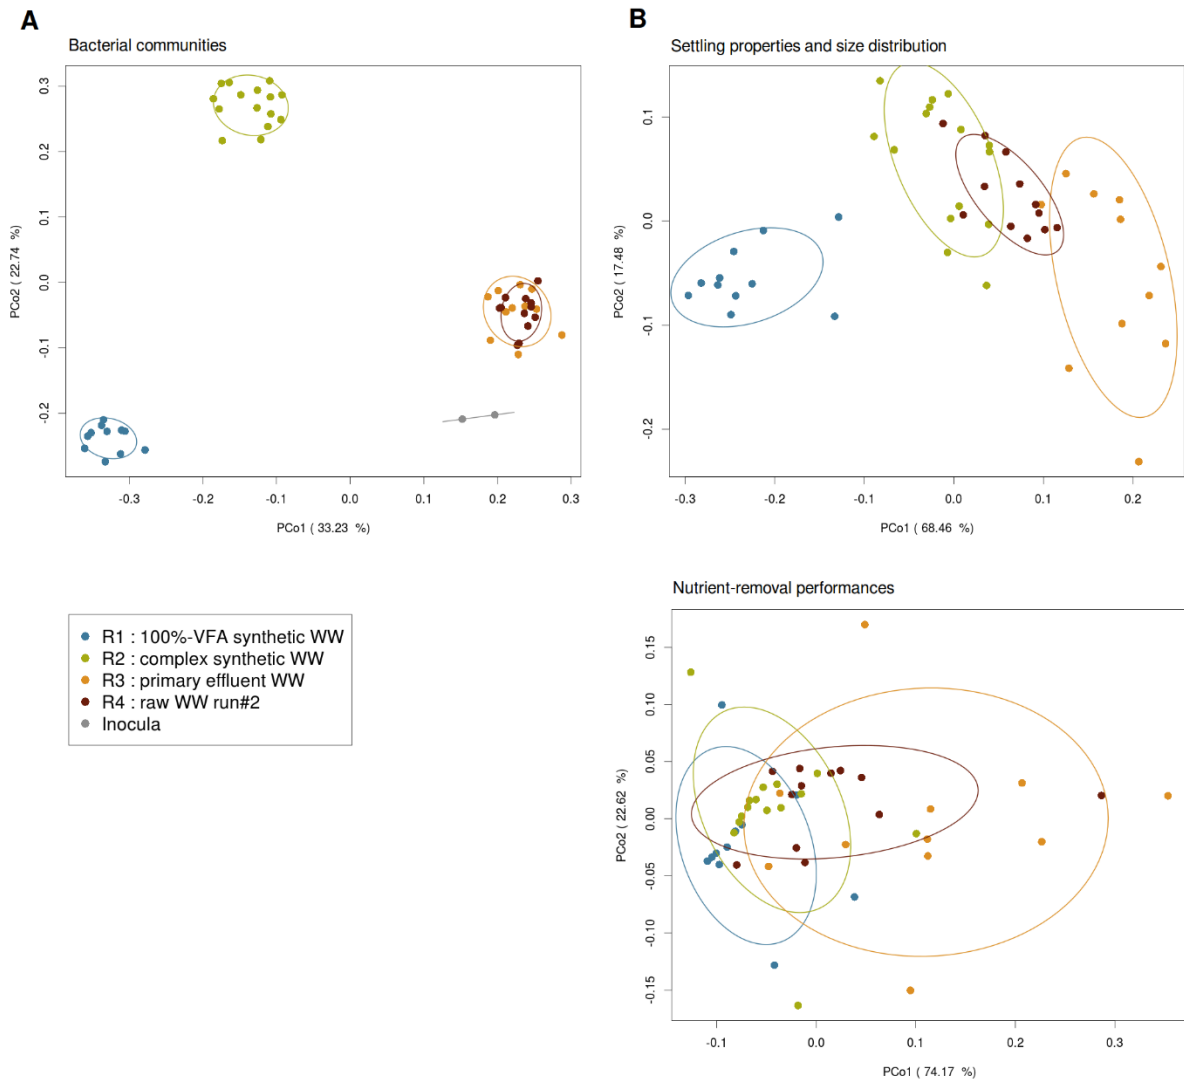

93 **Figure S17:** Principal component analysis based on the bray-curtis distance between the relative  
 94 abundance of bacterial taxa (A), the granule size distributions and settling properties (B), and the  
 95 nutrient-removal performances (C) in the four reactors during bacterial stable state. The ellipses  
 96 indicate the 70% confidence interval for the data related to each reactor.
